# Supplementary material for: Serological Evidence of Bat SARS-Related Coronavirus Infection in Humans, China
Source: Springer Nature journal article supplement (doi:10.1007/s12250-018-0012-7), 2018-02-01
Supplement: 12250_2018_12_MOESM_ESM.pdf [file 12250_2018_12_MOESM_ESM.pdf]

VIROLOGICA SINICA

## Electronic Supplementary Material

### Serological Evidence of Bat SARS-Related Coronavirus Infection in Humans, China

**Ning Wang<sup>1,2</sup>, Shi-Yue Li<sup>3</sup>, Xing-Lou Yang<sup>1</sup>, Hui-Min Huang<sup>3</sup>, Yu-Ji Zhang<sup>1</sup>, Hua Guo<sup>1,2</sup>, Chu-Ming Luo<sup>1,2</sup>, Maureen Miller<sup>4</sup>, Guangjian Zhu<sup>4</sup>, Aleksei A. Chmura<sup>4</sup>, Emily Hagan<sup>4</sup>, Ji-Hua Zhou<sup>5</sup>, Yun-Zhi Zhang<sup>5,6</sup>, Lin-Fa Wang<sup>7</sup>, Peter Daszak<sup>4</sup>, Zheng-Li Shi<sup>1</sup>✉**

1. CAS Key Laboratory of Special Pathogens and Biosafety, Wuhan Institute of Virology, Chinese Academy of Sciences, Wuhan 430071, China
2. University of Chinese Academy of Sciences, Beijing 100049, China
3. School of Health Sciences, Wuhan University, Wuhan 430071, China
4. EcoHealth Alliance, New York, NY10001, USA
5. Yunnan Provincial Key Laboratory for Zoonosis Control and Prevention, Yunnan Institute of Endemic Diseases Control and Prevention, Dali 671000, China
6. School of Public Health, Dali University, Dali 671000, China
7. Programme in Emerging Infectious Diseases, Duke-NUS Medical School, Singapore 169857, Singapore

Supporting information to DOI: 10.1007/s12250-018-0012-7

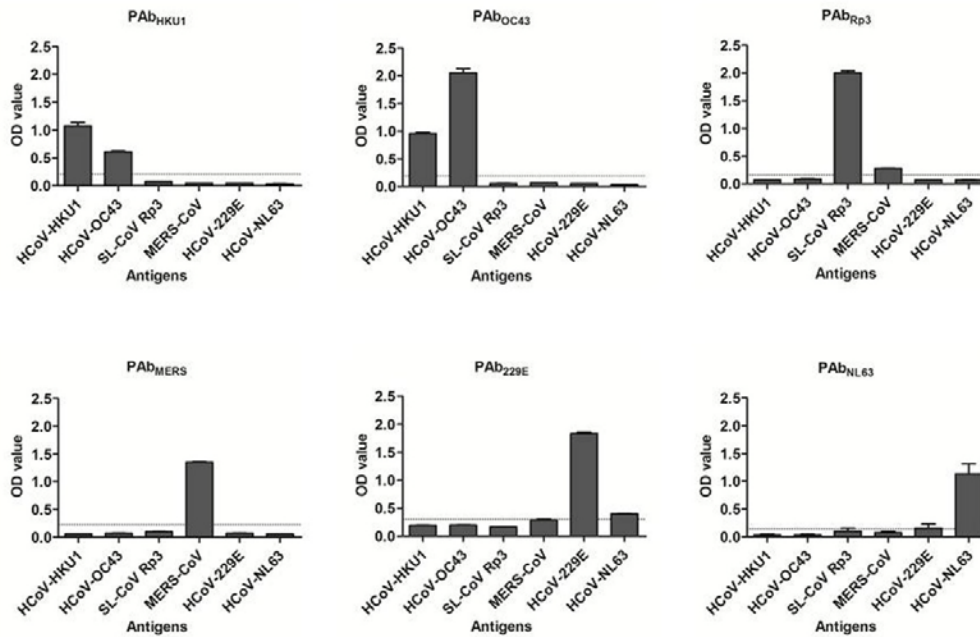

Figure S1. Two-way cross-reaction ELISA testing between 6 coronavirus NPs and their corresponding rabbit polyclonal antibodies. The NP proteins (100 ng/well) were coated in 96-well micro-plate and tested with polyclonal antibody against NPs of SARS-related CoV Rp3 (PAb<sub>Rp3</sub>), HCoV HKU1 (PAb<sub>HKU1</sub>), HCoV OC43 (PAb<sub>OC43</sub>), MERS-CoV (PAb<sub>MERS</sub>), HCoV229E (PAb<sub>229E</sub>) and HCoV NL63 (PAb<sub>NL63</sub>), respectively. The serum was diluted at 1:16,000 or 1:64,000 (for PAb<sub>229E</sub> and PAb<sub>NL63</sub>). HRP labeled goat anti-rabbit IgG (1:20,000) was used as secondary antibody and detected with TMB substrate. The horizontal line in the diagram indicates cutoff value determined from negative rabbit sera collected before immunization.

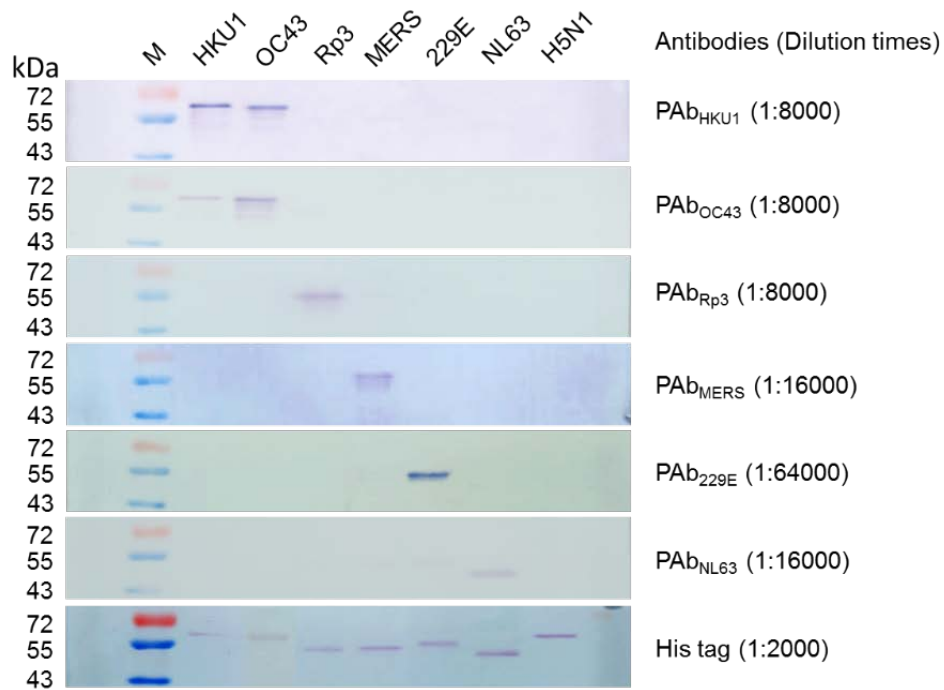

Figure S2. Two-way cross-reaction Western blotting between 6 coronavirus NPs and their corresponding rabbit polyclonal antibodies. The NP proteins (100 ng) were run on 12% SDS-PAGE and transferred to polyvinylidene difluoride membrane (Roche Diagnostics GmbH, Mannheim, Germany). The membrane was incubated with the different rabbit sera at different dilutions indicated on the right (in brackets). Goat anti-rabbit IgG conjugated with AP (Proteintech, Wuhan, China) were used for detection at a dilution of 1:2000. Influenza virus H5N1 NP was used as negative control. Numbers at the left are molecular masses (in kilodaltons).
